# Supplementary material for: Local and regional enhancements of CH 4 , CO, and CO 2 inferred from TCCON column measurements
Source: Copernicus journal article supplement (doi:10.5194/amt-17-5861-2024), 2024-10-07
Supplement: Supplementary file 1 [file amt-17-5861-2024-supplement.pdf]

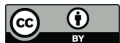

*Supplement of*

## **Local and regional enhancements of CH<sub>4</sub>, CO, and CO<sub>2</sub> inferred from TCCON column measurements**

**Kavitha Mottungan et al.**

*Correspondence to:* Avelino F. Arellano Jr. (afarellano@arizona.edu)

The copyright of individual parts of the supplement might differ from the article licence.

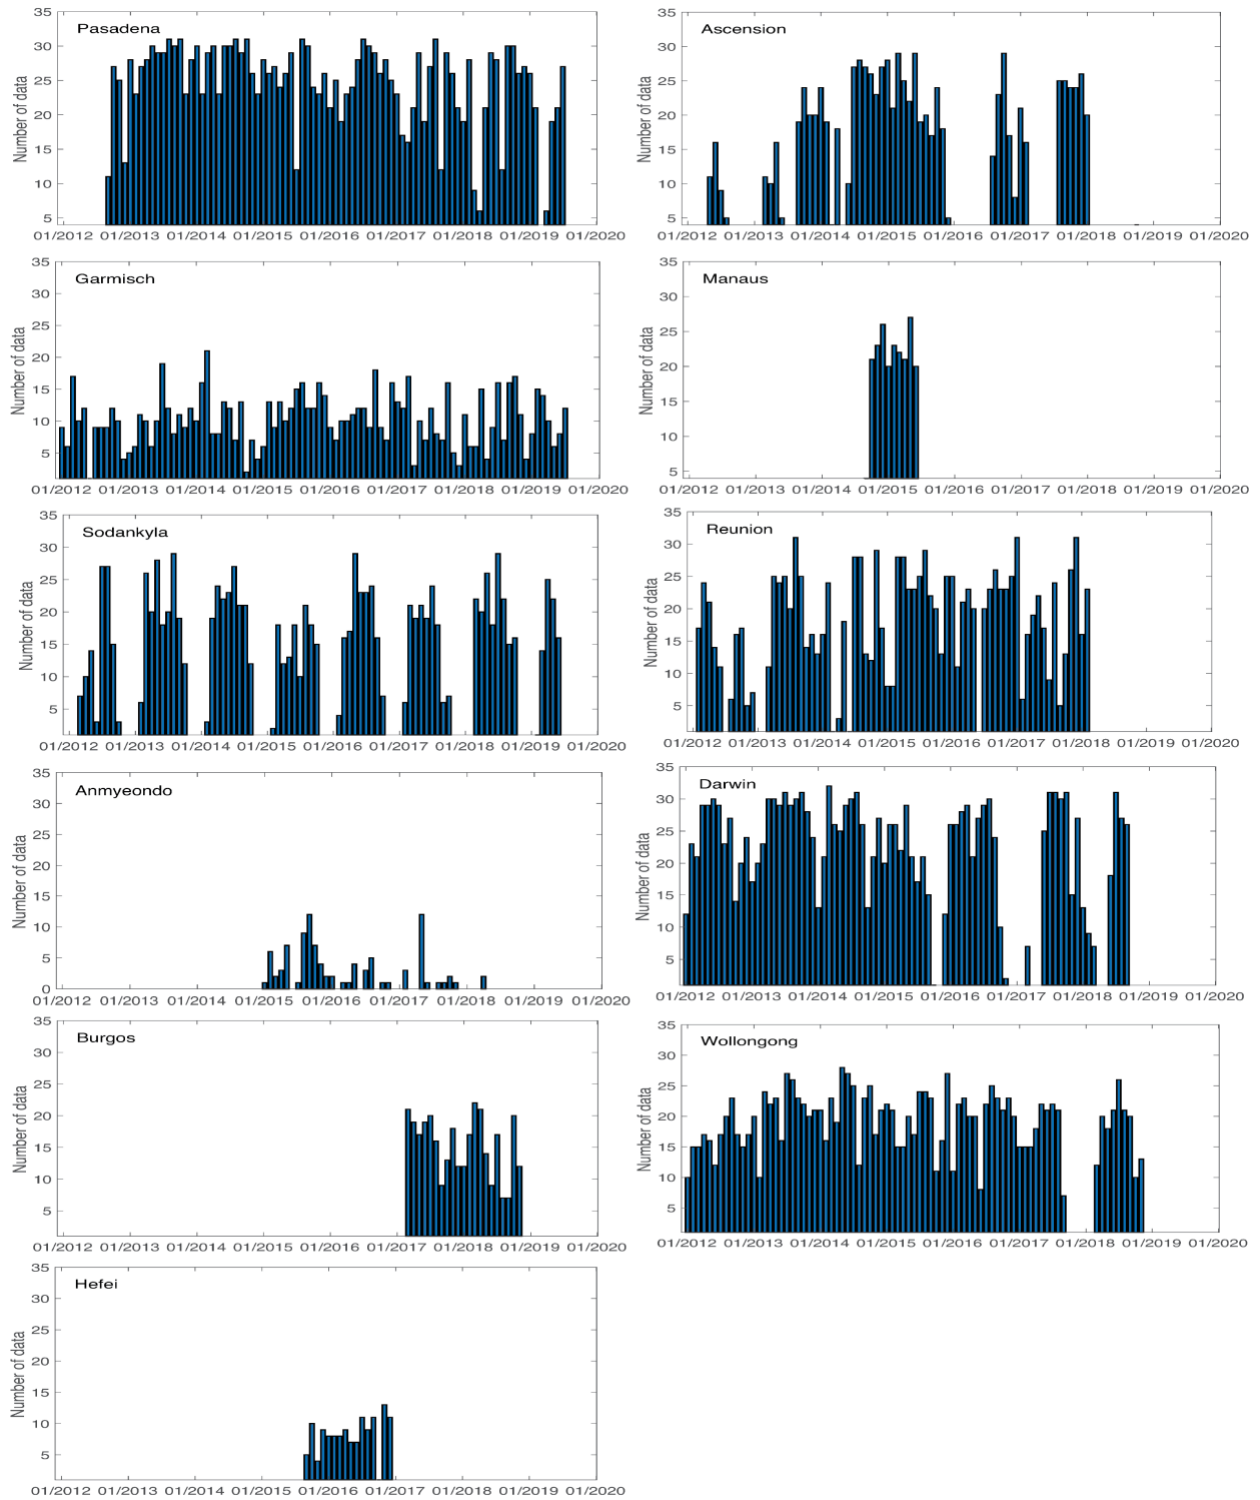

**Figure S1.** Number of data in a month during 2012-2019 for the 11 TCCON sites.

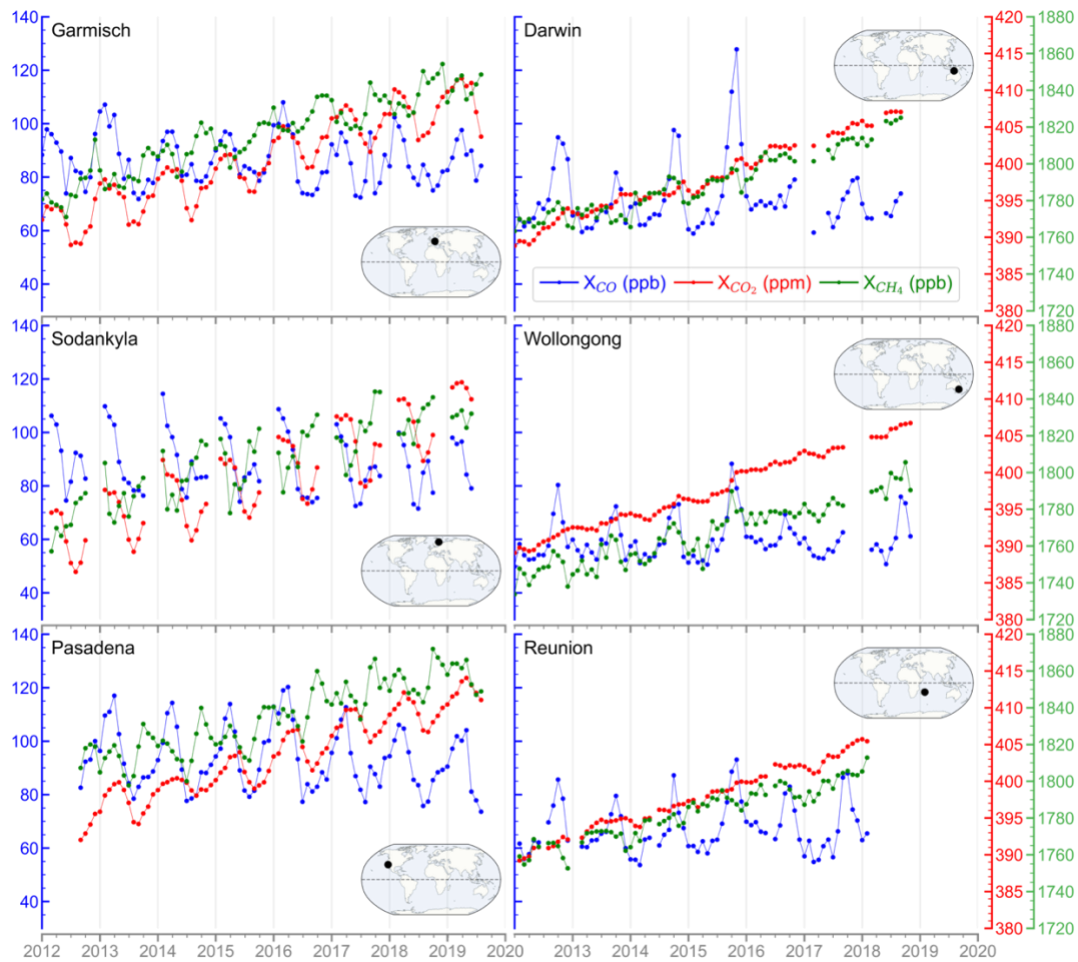

**Figure S2.** Monthly variation of TCCON CO, CO<sub>2</sub>, and CH<sub>4</sub> over 6 TCCON sites, (Garmisch, Darwin, Sodankylä, Wollongong, Pasadena, and Reunion) during 2012 to 2019. The insert maps depict the location of the TCCON sites and are marked by black circles.

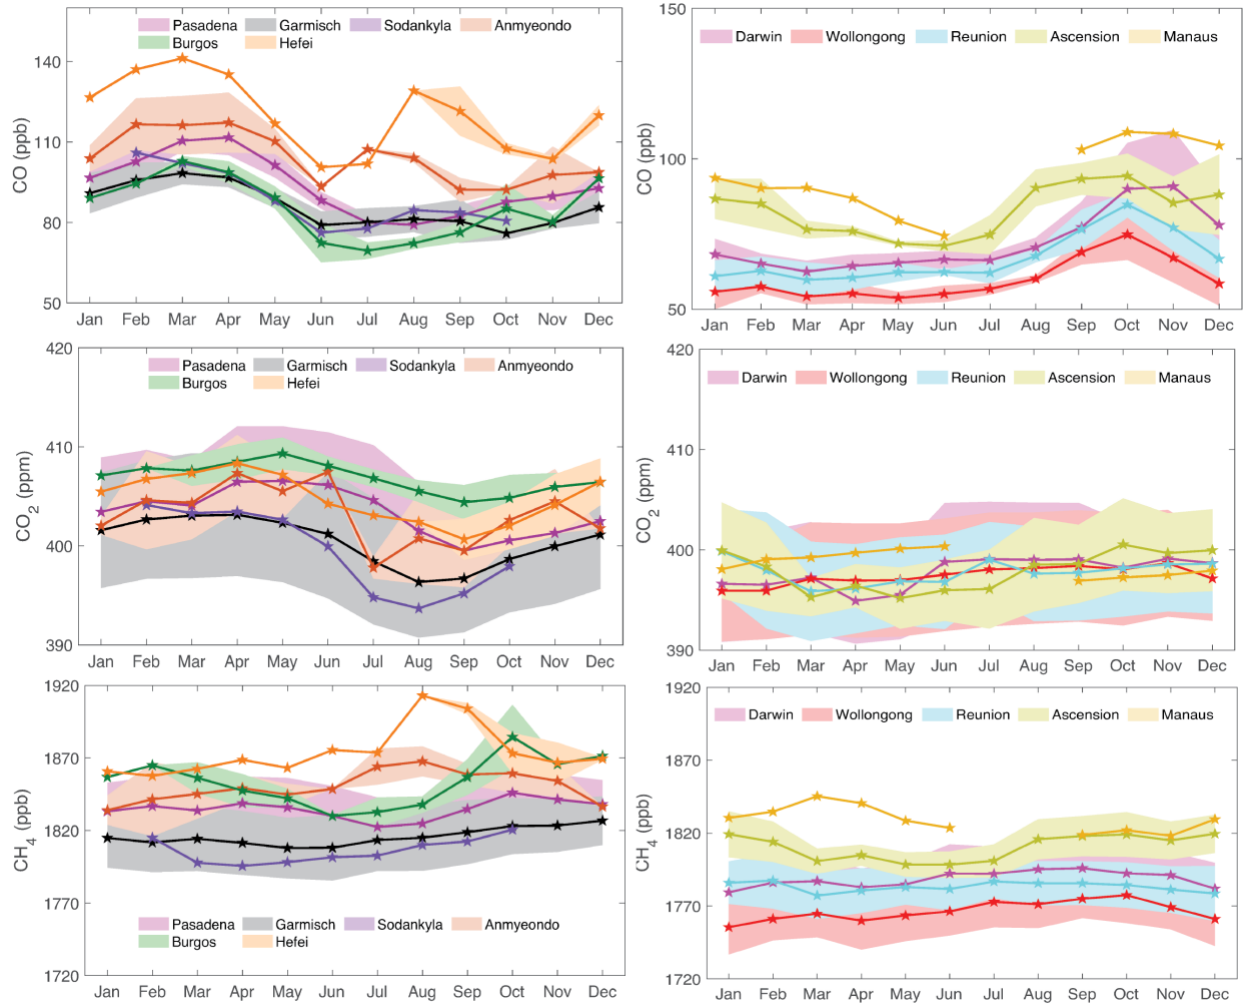

**Figure S3.** Average monthly variation of CO, CO<sub>2</sub>, and CH<sub>4</sub> over the Northern Hemispheric locations (Pasadena, Garmisch, Sodankyla, Anmyeondo, Burgos, Hefei) and Southern Hemispheric locations (Darwin, Wollongong, Reunion, Ascension, Manaus) during 2012-2019. Shading corresponds to the standard deviation during each monthly averaging period.

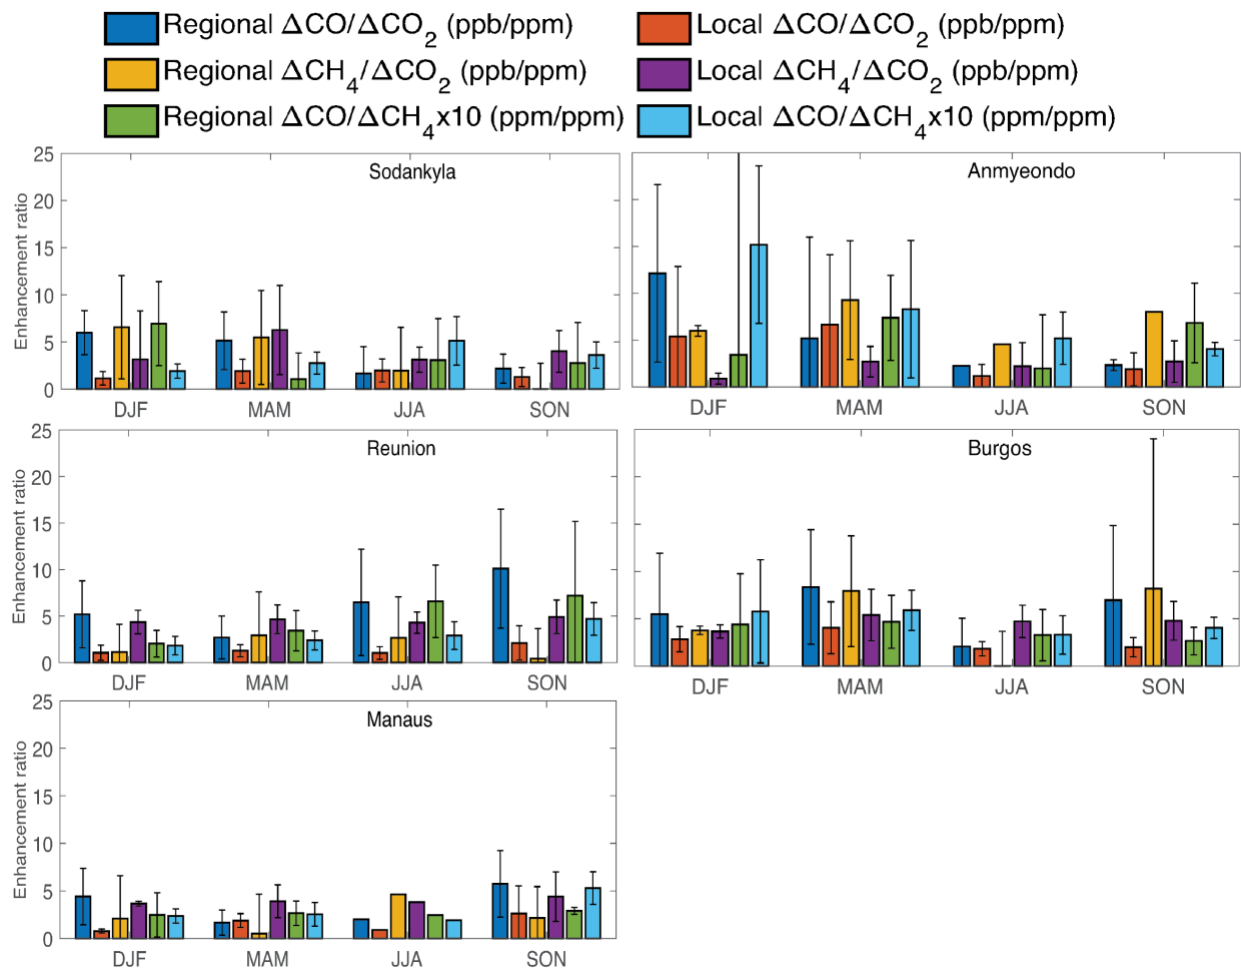

**Figure S4.** Average seasonal variation of regional and local enhancement ratio of  $X_{\text{CO}}/X_{\text{CO}_2}$ ,  $X_{\text{CH}_4}/X_{\text{CO}_2}$  and  $X_{\text{CO}}/X_{\text{CH}_4}$  over Sodankyla, Anmyeondo, Reunion, Burgos, and Manaus during 2012-2019.

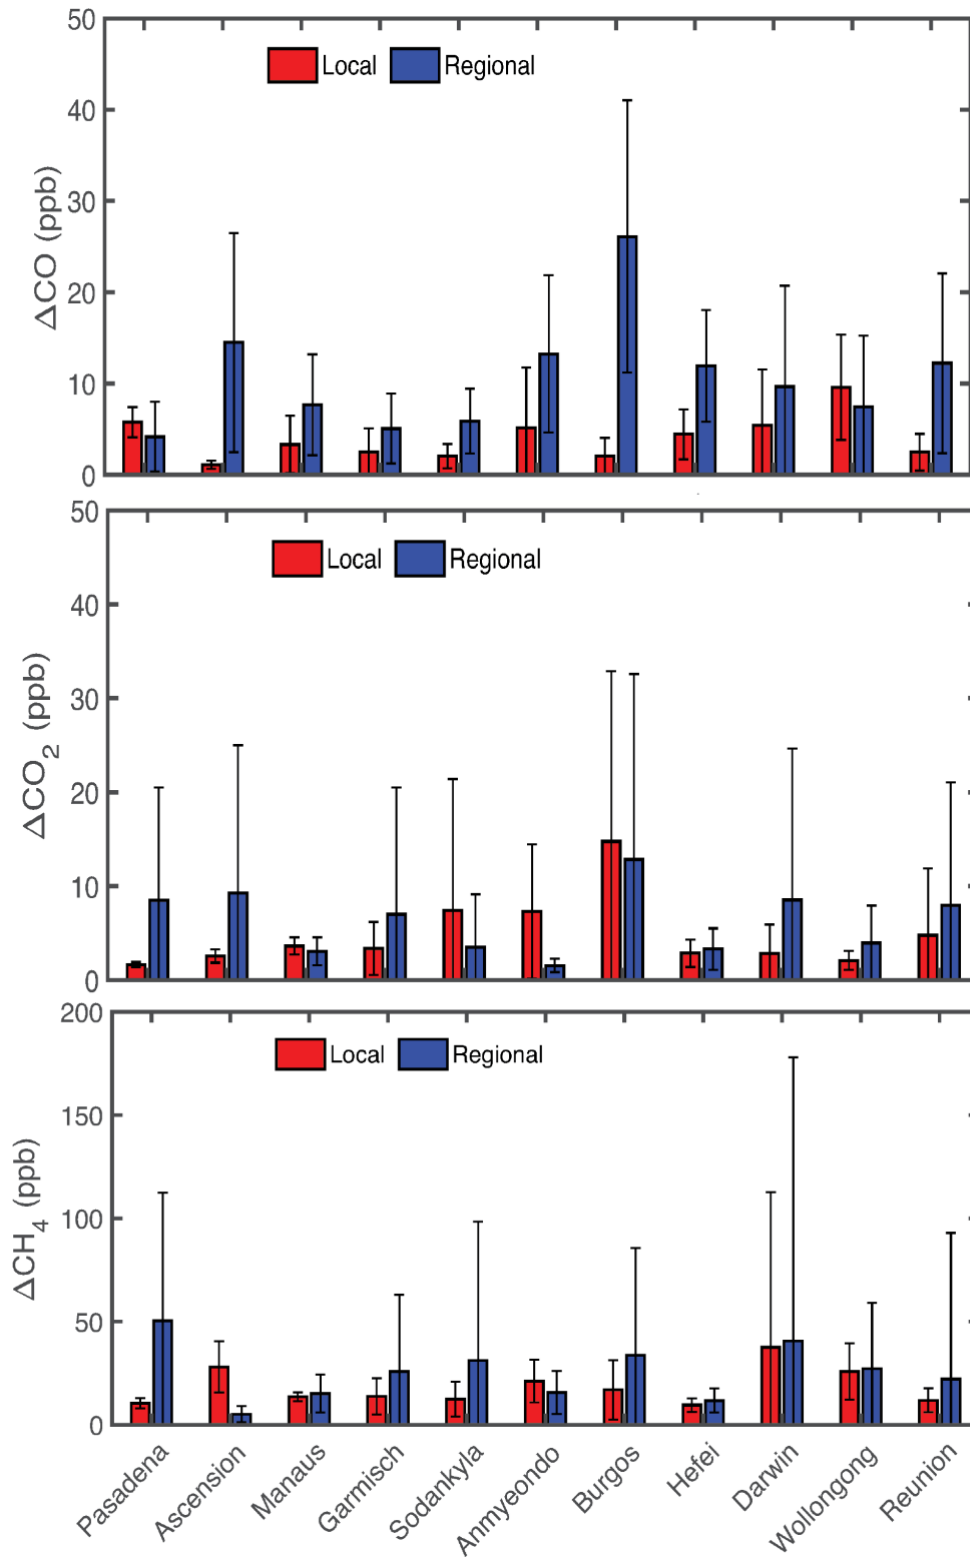

**Figure S5.** The relative increase in CO, CO<sub>2</sub> and CH<sub>4</sub> from the regional and local enhancements over Pasadena, Ascension, Manaus, Garmisch, Sodankyla, Anmyeondo, Burgos, Hefei, Darwin, Wollongong and Reunion during 2012-2019.

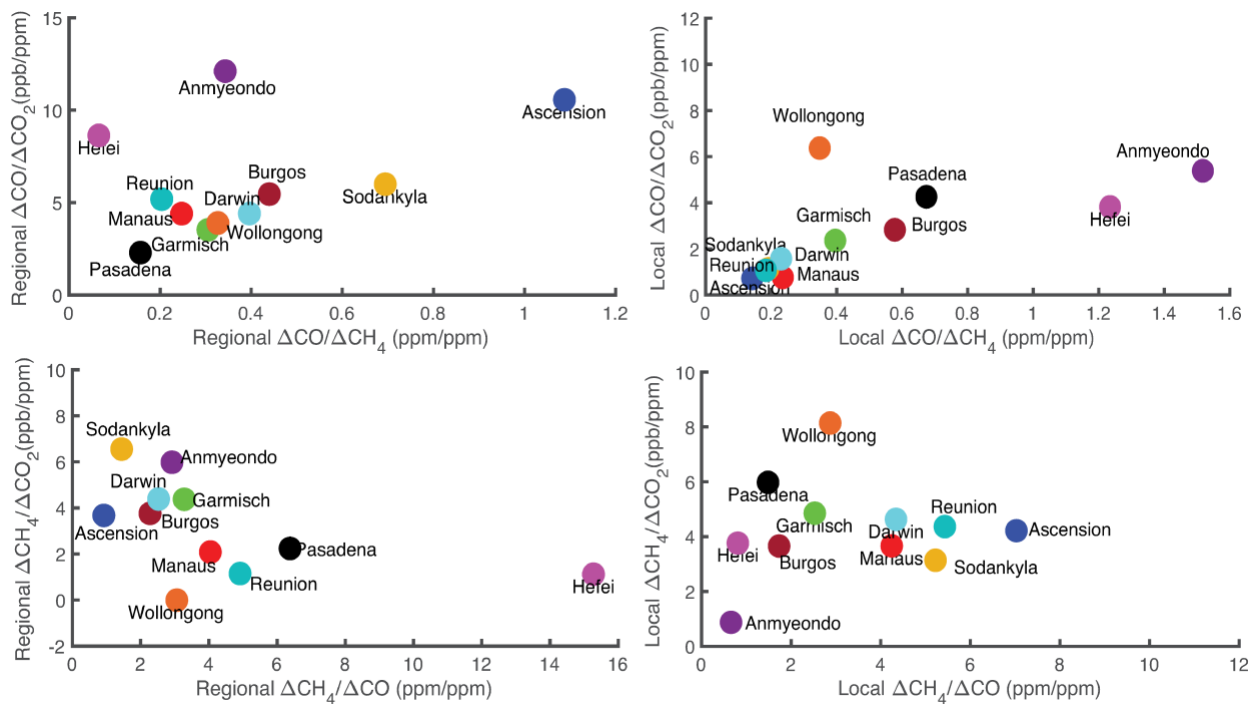

**Figure S6.** Scatter plot of average regional and local CO/CO<sub>2</sub> vs CO/CH<sub>4</sub> and CH<sub>4</sub>/CO<sub>2</sub> and CH<sub>4</sub>/CO during DJF months.

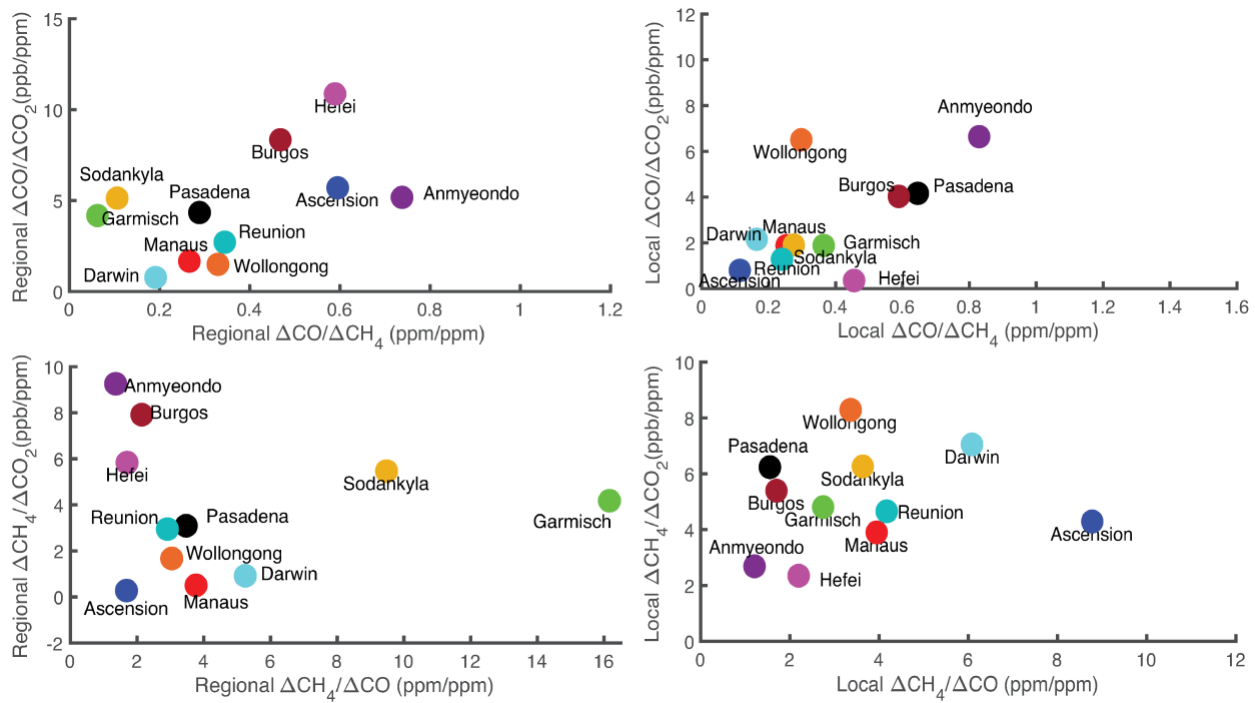

**Figure S7.** Scatter plot of average regional and local CO/CO<sub>2</sub> vs CO/CH<sub>4</sub> and CH<sub>4</sub>/CO<sub>2</sub> and CH<sub>4</sub>/CO during MAM months.

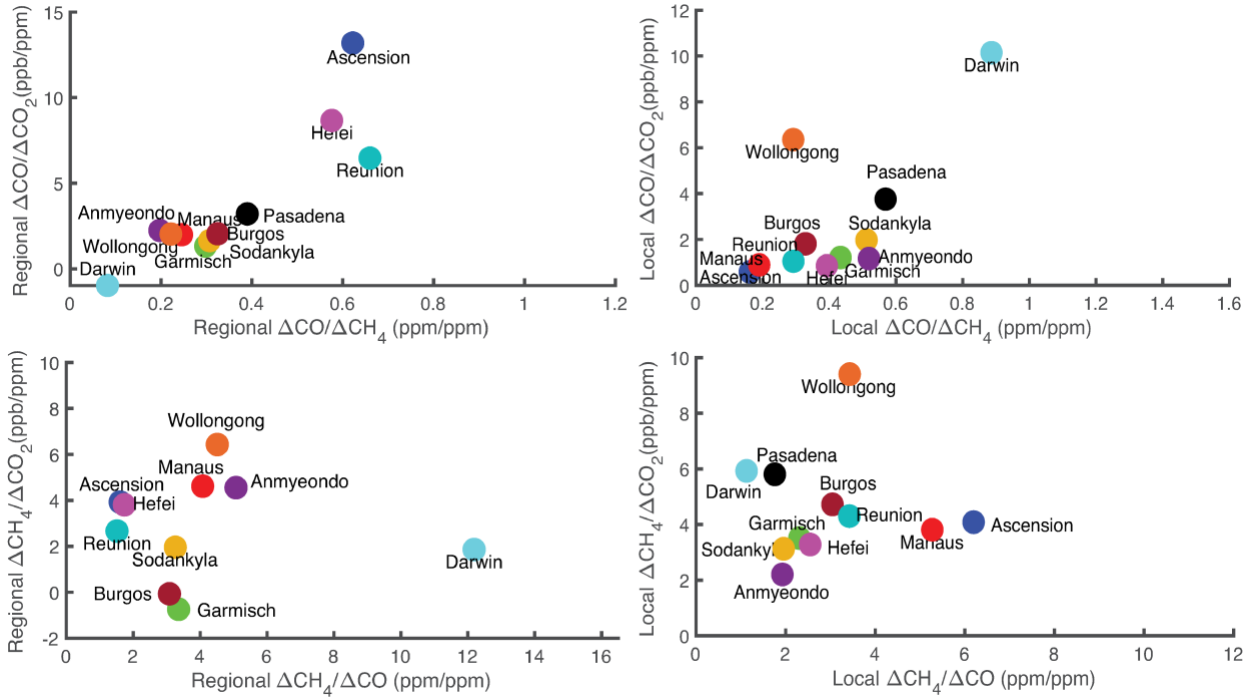

**Figure S8.** Scatter plot of average regional and local CO/CO<sub>2</sub> vs CO/CH<sub>4</sub> and CH<sub>4</sub>/CO<sub>2</sub> and CH<sub>4</sub>/CO during JJA months.

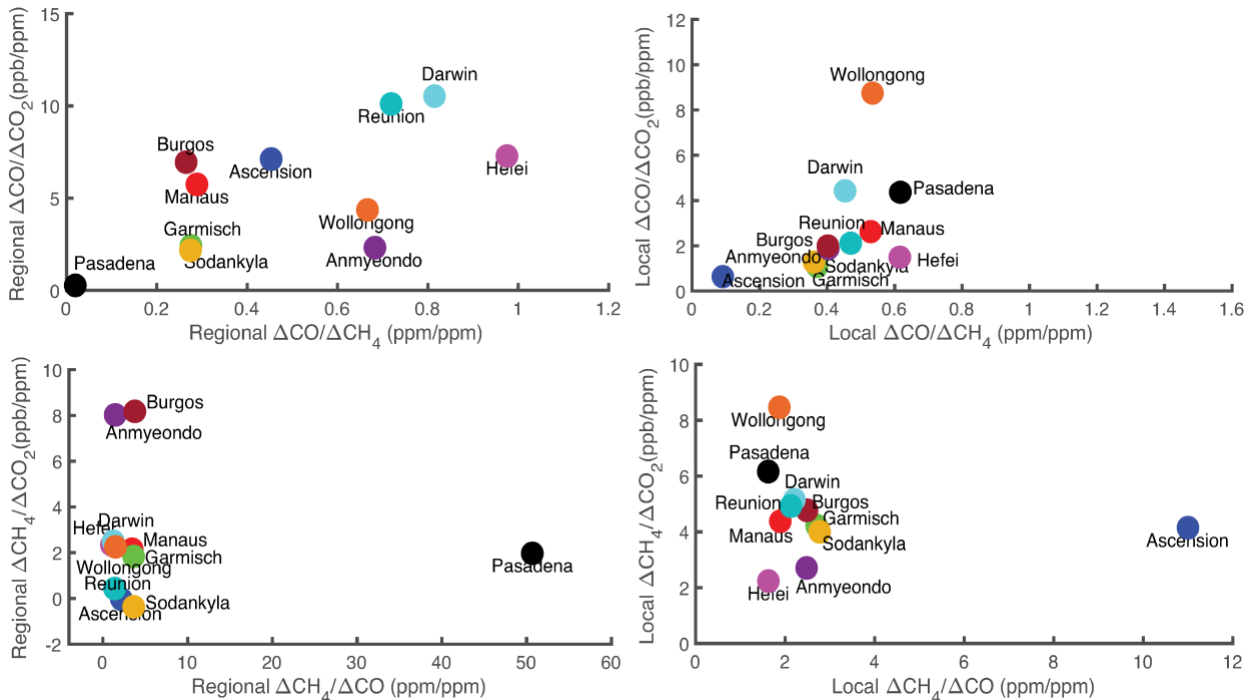

**Figure S9.** Scatter plot of average regional and local CO/CO<sub>2</sub> vs CO/CH<sub>4</sub> and CH<sub>4</sub>/CO<sub>2</sub> and CH<sub>4</sub>/CO during SON months.



**Table S1.** Number of monthly data points used to generate Figure 5 and seasonal averages of regional enhancement ratios during 2012-2019.

| Locations | Regional enhancement ratio of CO/CO <sub>2</sub> |    |    |    | Regional enhancement ratio of CH <sub>4</sub> /CO <sub>2</sub> |    |    |    | Regional enhancement ratio of CO/CH <sub>4</sub> |    |    |    |
|-----------|--------------------------------------------------|----|----|----|----------------------------------------------------------------|----|----|----|--------------------------------------------------|----|----|----|
|           | DJ                                               | MA | JJ | SO | DJ                                                             | MA | JJ | SO | DJ                                               | MA | JJ | SO |
|           | F                                                | M  | A  | N  | F                                                              | M  | A  | N  | F                                                | M  | A  | N  |
| Pasadena  | 21                                               | 19 | 8  | 18 | 15                                                             | 13 | 0  | 9  | 21                                               | 17 | 18 | 20 |
| Ascension | 12                                               | 7  | 5  | 15 | 12                                                             | 7  | 6  | 6  | 12                                               | 4  | 6  | 4  |
| Manaus    | 3                                                | 2  | 1  | 2  | 2                                                              | 3  | 1  | 2  | 3                                                | 3  | 1  | 2  |
| Garmisch  | 22                                               | 18 | 7  | 14 | 18                                                             | 17 | 3  | 14 | 21                                               | 21 | 19 | 19 |
| Sodankylä | 4                                                | 24 | 12 | 4  | 4                                                              | 17 | 8  | 10 | 4                                                | 19 | 22 | 12 |
| Anmyeond  | 2                                                | 4  | 1  | 2  | 2                                                              | 4  | 1  | 1  | 2                                                | 3  | 2  | 2  |
| Burgos    | 3                                                | 5  | 3  | 6  | 3                                                              | 5  | 3  | 5  | 3                                                | 6  | 6  | 5  |
| Hefei     | 4                                                | 3  | 3  | 5  | 4                                                              | 3  | 2  | 5  | 4                                                | 3  | 3  | 5  |
| Darwin    | 11                                               | 10 | 14 | 9  | 17                                                             | 13 | 19 | 12 | 10                                               | 14 | 16 | 13 |
| Wollongon | 16                                               | 20 | 20 | 19 | 17                                                             | 19 | 20 | 19 | 13                                               | 14 | 18 | 17 |
| Reunion   | 9                                                | 11 | 10 | 17 | 13                                                             | 14 | 13 | 14 | 10                                               | 12 | 8  | 9  |

**Table S2.** Number of monthly data points used to generate the Figure 5 and seasonal average of local enhancement ratios during 2012-2019.

| Locations | Local enhancement ratio of CO/CO <sub>2</sub> |    |    |    | Local enhancement ratio of CH <sub>4</sub> /CO <sub>2</sub> |    |    |    | Local enhancement ratio of CO/CH <sub>4</sub> |    |    |    |
|-----------|-----------------------------------------------|----|----|----|-------------------------------------------------------------|----|----|----|-----------------------------------------------|----|----|----|
|           | DJ                                            | MA | JJ | SO | DJ                                                          | MA | JJ | SO | DJ                                            | MA | JJ | SO |
|           | F                                             | M  | A  | N  | F                                                           | M  | A  | N  | F                                             | M  | A  | N  |
| Pasadena  | 21                                            | 20 | 19 | 21 | 17                                                          | 16 | 10 | 19 | 21                                            | 19 | 18 | 21 |
| Ascension | 12                                            | 7  | 10 | 15 | 12                                                          | 8  | 12 | 16 | 12                                            | 7  | 10 | 13 |
| Manaus    | 3                                             | 3  | 1  | 2  | 3                                                           | 3  | 1  | 2  | 3                                             | 3  | 1  | 2  |
| Garmisch  | 22                                            | 21 | 20 | 18 | 19                                                          | 23 | 20 | 18 | 22                                            | 23 | 22 | 19 |
| Sodankylä | 4                                             | 24 | 22 | 14 | 4                                                           | 24 | 22 | 13 | 4                                             | 24 | 22 | 14 |
| Anmyeond  | 3                                             | 4  | 3  | 3  | 3                                                           | 5  | 3  | 3  | 5                                             | 5  | 5  | 2  |
| Burgos    | 3                                             | 5  | 3  | 6  | 3                                                           | 6  | 6  | 6  | 3                                             | 6  | 6  | 5  |
| Hefei     | 4                                             | 3  | 3  | 6  | 4                                                           | 3  | 3  | 6  | 4                                             | 3  | 3  | 5  |
| Darwin    | 17                                            | 16 | 20 | 15 | 17                                                          | 17 | 21 | 18 | 15                                            | 15 | 16 | 14 |
| Wollongon | 16                                            | 20 | 20 | 19 | 17                                                          | 20 | 20 | 19 | 13                                            | 14 | 19 | 17 |
| Reunion   | 17                                            | 16 | 12 | 17 | 17                                                          | 17 | 15 | 18 | 10                                            | 12 | 8  | 9  |
